# Supplementary material
Source: PubMed Central journal article supplement (PMC6919247)
Supplement: Supp_Fig1.pdf [file Supp_Fig1.pdf]

## Supplementary Data

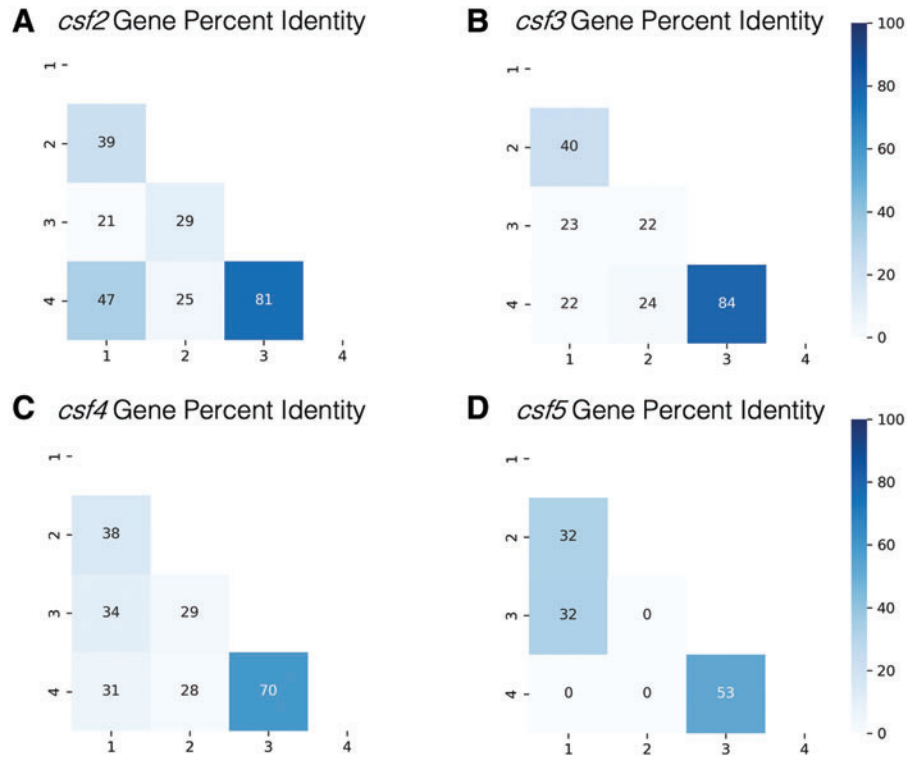

**SUPPLEMENTARY FIG. S1.** Representative amino acid sequences from each variant for each conserved gene were compared by identity. Each sequence was aligned using blastp using the BLOSUM62 scoring matrix. **(A)** Csf2 compared against Csf2. **(B)** Csf3 compared against Csf3. **(C)** Csf4/DinG compared against Csf4/DinG. **(D)** Csf5/Cas6 compared against Csf5/Cas6.
