# Supplementary material
Source: PubMed Central journal article supplement (PMC6919247)
Supplement: Supp_Table2.pdf [file Supp_Table2.pdf]

**Supplementary Table S2. Summary information of *Pseudomonas* strains containing the CRISPR type IV-A(1–4) systems, including designated system name, the genome that the system is located in, genome accession number, genes of the system, repeat consensus sequence, and spacer sequence**

| System name | Genome name                                                              | Genome accession | Gene 1                           | Gene 2                           | Gene 3                           | Gene 4                           | Gene 5                   | Repeat consensus              | Spacer sequences                                                                                                                                                                                                                                                                                                                                                                                                                                      |
|-------------|--------------------------------------------------------------------------|------------------|----------------------------------|----------------------------------|----------------------------------|----------------------------------|--------------------------|-------------------------------|-------------------------------------------------------------------------------------------------------------------------------------------------------------------------------------------------------------------------------------------------------------------------------------------------------------------------------------------------------------------------------------------------------------------------------------------------------|
| A1_1        | <i>Pseudomonas</i> sp. 34-62-33 04302015_34_scaffold_57                  | NCJV01000006.1   | <i>csf4</i> -reverse, OZB34657.1 | <i>csf5</i> , OZB34658.1         | <i>csf1</i> , OZB34659.1         | <i>csf2</i> , OZB34660.1         | <i>csf3</i> , OZB34661.1 | GTATTCCCCGCGTGCGCGG GGTGAGCG  | >GCCCAAACCTGTGCCACCAAGCACCACAAC>CAGATGCCT GAGATTGGCGCAAAACCACTTAC>TTCTCTTGGGTAAACCAG CCCTCGATCAGTCC>GTTTGTGGCGATCTTCTCAGCTCCCAT CATT>GCGAAGTAGGCGATCAGCAGTGCAGCATGCC>CAT GTTTGCGAACTGAACAGCATGGCGTCCA>GCATACGATGA GAGCGGTGGCGTGTTCGG>TCCTGTAGCGCACGTTGCGA AACCGCAGCAAC>TATTTTGGGGATTTGAAGGGGTATTGACG GTT>GGCTGTGGGGGTGAGAAATGAGCAAGCGCGAA>CATC ATGCTGAGGGCCGATTTGGCGGATAAGG>TCTGGCAGGTCTGT CCCAGTCTCTGCGTTG>GATTCTGACGAACGTCATATGA GTCAGCCGAT         |
| A1_2        | <i>Pseudomonas aeruginosa</i> genome assembly P40_Scotland_4_VIM_2_09_12 | CVUM01000112.1   | <i>csf4</i> -reverse, CRN66652.1 | <i>csf5</i> , CRN66678.1         | <i>csf1</i> , CRN66706.1         | <i>csf2</i> , CRN66744.1         | <i>csf3</i> , CRN66771.1 | GTATTCCCCGCGTGCGCG GGGGTGAGCG | >GAAACAACCTGTTTTCAGAGCATCGGAACC>GACGGTGGC CAAGAAGGTCACCCGGCAATTACG>ATCACGACCTGCCTGA AGGCTGGGTCACTAAT>GATCGCCCGCTCGGAAGCTGCC AGCTTT>GGTACTCATCGGACAACGTAATGGCTCCCGGCC AA>GGTCGCCAGCTCGGAACGTGCCTGCTCGATCT>GAGAA AGCCGAGGAATCACCGAACCGGATTC>GTCAGCCAGGCTAG CCCGCTGGCAGCTGCTCAC>GGAGGCATACGACGACGACGCC CAGGCCCGCAGC>GATGGTCCAAGAGCATGGTCAGGAGAGCC AGC>GGGTGCTGAACGGCAGCTACCTACGTCAACT>GAA TGTGTACGACGATGCTGACGAGAAATGGC>GTCTAGGTACA GCAGCACTGCCAGCACTGCA |
| A1_3        | <i>P. aeruginosa</i> strain PA83 Plasmid                                 | CP017294         | <i>csf3</i> -reverse, ASJ88789.1 | <i>csf2</i> -reverse, ASJ88790.1 | <i>csf1</i> -reverse, ASJ88791.1 | <i>csf5</i> -reverse, ASJ88792.1 | <i>csf4</i> , ASJ88793.1 | GTGTCCCCGCTTACG CGGGGTGAACG   | >GAATGAAATCACCCCTTCCCAGCTTCGAAACCT>GTGGATGG ATTAACGCATGGCTGGAAAGGTGCC>AATCGCAGCGGGAATA TTCCCTGCGCCCTTACC>GGTGGCAAGCGGCTGCGATCCCT TCCGGCGTGA>GATTCAAGATGGCTGTAATGTTGGTCTGCTT GCA>TATGTAACCCGTTACTTTTCGCTGTTCCGGTA>TATC GCTGAACCTAAAGCACTAGCTGCCGACG>GAACCCCTGCTGG CTAGCCGGCTGCAAGTACTTTT>GCGGCATACCTGCTTACTC CGCAGACTGT>GGAATGCCATCTGGCTGCGTTACGTCGT ATGT                                                                                              |
| A1_4        | <i>Pseudomonas putida</i> plasmid pKF715A DNA                            | AP015030.1       | <i>csf3</i> -reverse, BAW26656.1 | <i>csf2</i> -reverse, BAW26657.1 | <i>csf1</i> -reverse, BAW26658.1 | <i>csf5</i> -reverse, BAW26659.1 | <i>csf4</i> , BAW26660.1 | GTATTCCCCGCGTGCG CGGGGTGAACG  | >GTGACTATCGAGCAAAACAGGGGGATTAATCC>AGTGCCCT TGAATAACCCATGATTACCAGAT>CTCCGGCGTGAGCAATTCT GTTATGCGCAAGAGC>TAAGTACCGCCAAGCGGGTGAGCA GTGCCCG>ACTGGACTGGCTGCACGCGAGGCTGCCTAGGGC >TTGAGAACTAAGGGAGATCGGTATGAAACA>CGGGGCA GGTTCATTCTGTCACCCACTGGCTG>GGTTCCTGGATTCCCA CCGGCACCGGAATCC>TCCTGTAGCGCACGTCGCGAAACCGC AGCAAC>TATTTTGGGGATTTGAAGGGGTATTGACGGTT>AA CCGTCAATACCCCTTCAAATCCCAAAAATA>TGGCGCCTCT GCTGAAAGCGAGCTGACGTGTA                                   |
| A1_5        | <i>Pseudomonas stutzeri</i> B1SMN1                                       | AMVM01000016.1   | <i>csf4</i> -reverse, EPL60777.1 | <i>csf5</i> , EPL60778.1         | <i>csf1</i> , EPL60779.1         | <i>csf2</i> , EPL60779.1         | <i>csf3</i> , EPL60781.1 | GTATTCCCCGCGTGCG CGGGGTGAACG  | >GGCTGTGGGGATGAGAAATGAGCAAGCGCGAA>GTGACTAT CGAGCAAAACAGGGGGATTAATCC>AGTGCCTTGAAT ACCCATGATTACCAGAT>CTCCGGCGTGAGCATTTCTGTTA TGCGCAAGAGC>TAAGTACCGCCAAGCGGGTGAGCAGTGC CCG>GGTTCCTGGATTCCCACCGGCACCGGAATCC>TCCT GTAGCGCACGTCGCGAAACCGCAGCAAC>TATTTTGGGGA TTTGAAGGGGTATTGACGGTT>TGCGGCCTCTGCTGAAAGCG AGCTGACGTGTA>GGCTGTGGGGATGAGAAATGAGCAAGC GCGAA                                                                                                       |

(continued)

Supplementary Table ST2. (Continued)

| System name | Genome name                                                            | Genome accession | Gene 1                           | Gene 2                           | Gene 3                           | Gene 4                           | Gene 5                   | Repeat consensus                 | Spacer sequences                                                                                                                                                                                                                                                                                                                                                                                                                                                                                                                                                                |
|-------------|------------------------------------------------------------------------|------------------|----------------------------------|----------------------------------|----------------------------------|----------------------------------|--------------------------|----------------------------------|---------------------------------------------------------------------------------------------------------------------------------------------------------------------------------------------------------------------------------------------------------------------------------------------------------------------------------------------------------------------------------------------------------------------------------------------------------------------------------------------------------------------------------------------------------------------------------|
| A1_6        | <i>Pseudomonas oleovorans</i> subsp. <i>oleovorans</i> strain DSM 1045 | NIUB01000035.1   | <i>csf3</i> -reverse, OWK40672.1 | <i>csf2</i> -reverse, OWK40673.1 | <i>csf1</i> -reverse, OWK40674.1 | <i>csf5</i> -reverse, OWK40675.1 | <i>csf4</i> , OWK40676.1 | GTATTCCCCGCGTGCG<br>CGGGGGTTAGCG | >TAAGGTTTCGAGGTGCATAGGCCGACGGGAGGG>GTGACTATC<br>GAGCAAAAACAGGGGGATTAATCC>AGTGCCCTTGAAATA<br>CCCATGATTACAGAT>CTCCGGCGTGAGCATTTCTGTATGC<br>GCAAGAGC>GTTTGTGGCGATCTCTCAGTCCCATCATT<br>>TAAGTACCGCCCAAGCGGGTGAAGCAGTCCCG>GGTTCCC<br>TGGATTCCCACCGGCACCGAATCC>TCCTGTAGCGCACGT<br>CGCGAAACCGCAGCAAC>GTTTGTGGCGATCTCTCAGTCC<br>ATCATT>TATTTTGGGGATTGAAGGGGATTGACGGTT>CA<br>TGTTTGCGAACTGAACAGCATGCGGTGCCA>GCATACGATGA<br>GAGCGGTGGCGTGTTCGG>TACACGTCAGCTCGCTTCAG<br>CAGAGGCCGA>TCCTGTAGCGCACGTTCGAAACCGCAGC<br>AAC>TATTTTGGGGATTGAAGGGGATTGACGGTT>GGCTGT<br>GGGGGTGAGAAATGAGCAAGCGCGAA |
| A2_1        | <i>P. aeruginosa</i> BL14                                              | AXPM01000021.1   | <i>csf4</i> -reverse, ERV23968.1 | <i>csf5</i> , ERV23969.1         | <i>csf1</i> , ERV23970.1         | <i>csf2</i> , ERV23971.1         | <i>csf3</i> , ERV23972.1 | GTATTCCCCGCGCAGGCGG<br>GGTTAGCG  | >GGCTGTGGGGATGAGAAATGAGCAAGCGCGAA>CATCCAAGT<br>TACGCATCAGATTCGAGACGCGA>CTATGCAGGGCTGGTGC<br>GATTCCTTCTTCCA                                                                                                                                                                                                                                                                                                                                                                                                                                                                      |
| A2_2        | <i>P. aeruginosa</i> BWHPA028                                          | AXQA01000038.1   | <i>csf3</i> -reverse, ERV69443.1 | <i>csf2</i> -reverse, ERV69444.1 | <i>csf1</i> -reverse, ERV69445.1 | <i>csf5</i> -reverse, ERV69446.1 | <i>csf4</i> , ERV69447.1 | GTATTCCCCGCGCAG<br>GCGGGGGTTAGCG | >GGCTGTGGGGATGAGAAATGAGCAAGCGCGAA>CATCCAAGT<br>TACGCATCAGATTCGAGACGCGA>CTATGCAGGGCTGGTGC<br>GATTCCTTCTTCCA                                                                                                                                                                                                                                                                                                                                                                                                                                                                      |
| A2_3        | <i>P. aeruginosa</i> PS42                                              | AZZD01000055.1   | <i>csf4</i> -reverse, ETU71866.1 | <i>csf5</i> , ETU71867.1         | <i>csf1</i> , ETU71868.1         | <i>csf2</i> , ETU71869.1         | <i>csf3</i> , ETU71870.1 | GTATTCCCCGCGCAGG<br>CGGGGGTTAGCG | >GGCTGTGGGGATGAGAAATGAGCAAGCGCGAA>CATCCAAG<br>TTACGCATCAGATTCGAGACGCGA>CTATGCAGGGCTGGTGC<br>GCGATTTCCTTCTTCCA                                                                                                                                                                                                                                                                                                                                                                                                                                                                   |
| A2_4        | <i>P. aeruginosa</i> genome assembly P26_Wales_1_VIM_2_11_10           | CVVN01000207.1   | <i>csf4</i> -reverse, CRP74518.1 | <i>csf5</i> , CRP74545.1         | <i>csf1</i> , CRP74569.1         | <i>csf2</i> , CRP74593.1         | <i>csf3</i> , CRP74621.1 | GTATTCCCCGCGCAGGCG<br>GGGGTTAGCG | >GGCTGTGGGGATGAGAAATGAGCAAGCGCGAA>CATCCAAGT<br>TACGCATCAGATTCGAGACGCGA>CTATGCAGGGCTGGTGC<br>GATTCCTTCTTCCA                                                                                                                                                                                                                                                                                                                                                                                                                                                                      |
| A2_5        | <i>P. aeruginosa</i> genome assembly P31_Wales_1_VIM_2_11_11           | CVVS01000266.1   | <i>csf4</i> -reverse, CRQ25908.1 | <i>csf5</i> , CRQ25928.1         | <i>csf1</i> , CRQ25947.1         | <i>csf2</i> , CRQ25962.1         | <i>csf3</i> , CRQ25982.1 | GTATTCCCCGCGCAGG<br>CGGGGGTTAGCG | >GGCTGTGGGGATGAGAAATGAGCAAGCGCGAA>CATCCAAGT<br>TACGCATCAGATTCGAGACGCGA>CTATGCAGGGCTGGTGC<br>ATTCCTTCTTCCA                                                                                                                                                                                                                                                                                                                                                                                                                                                                       |
| A2_6        | <i>P. aeruginosa</i> genome assembly P44_Wales_1_VIM_2_11_12           | CVWL01000377.1   | <i>csf4</i> -reverse, CRR52784.1 | <i>csf5</i> , CRR52812.1         | <i>csf1</i> , CRR52838.1         | <i>csf2</i> , CRR52863.1         | <i>csf3</i> , CRR52884.1 | GTATTCCCCGCGCAG<br>GCGGGGGTTAGCG | >GGCTGTGGGGATGAGAAATGAGCAAGCGCGAA>CATCCAAGT<br>TACGCATCAGATTCGAGACGCGA>CTATGCAGGGCTGGTGC<br>ATTCCTTCTTCCA                                                                                                                                                                                                                                                                                                                                                                                                                                                                       |
| A2_7        | <i>P. aeruginosa</i> genome assembly P59_Wales_1_VIM_2_09_13           | CVXN01000299.1   | <i>csf4</i> -reverse, CRS25516.1 | <i>csf5</i> , CRS25518.1         | <i>csf1</i> , CRS25519.1         | <i>csf2</i> , CRS25521.1         | <i>csf3</i> , CRS25523.1 | GTATTCCCCGCGCAGG<br>GGGGGGTTAGCG | >GGCTGTGGGGATGAGAAATGAGCAAGCGCGAA>CATCCAAG<br>TTACGCATCAGATTCGAGACGCGA>CTATGCAGGGCTGGTGC<br>GATTCCTTCTTCCA                                                                                                                                                                                                                                                                                                                                                                                                                                                                      |
| A2_8        | <i>P. aeruginosa</i> genome assembly P27_Wales_1_VIM_2_02_11           | CVVX01000279.1   | <i>csf4</i> -reverse, CRQ02815.1 | <i>csf5</i> , CRQ02834.1         | <i>csf1</i> , CRQ02856.1         | <i>csf2</i> , CRQ02885.1         | <i>csf3</i> , CRQ02903.1 | GTATTCCCCGCGCAGG<br>CGGGGGTTAGCG | >GGCTGTGGGGATGAGAAATGAGCAAGCGCGAA>CATCCAAG<br>TTACGCATCAGATTCGAGACGCGA>CTATGCAGGGCTGGTGC<br>CGATTTCCTTCTTCCA                                                                                                                                                                                                                                                                                                                                                                                                                                                                    |
| A2_9        | <i>P. aeruginosa</i> genome assembly P19_London_7_VIM_2_05_10          | CVVU01000234.1   | <i>csf4</i> -reverse, CRP63394.1 | <i>csf5</i> , CRP63426.1         | <i>csf1</i> , CRP63451.1         | <i>csf2</i> , CRP63481.1         | <i>csf3</i> , CRP63510.1 | GTATTCCCCGCGCAGG<br>CGGGGGTTAGCG | >GGCTGTGGGGATGAGAAATGAGCAAGCGCGAA>CATCCAAG<br>TTACGCATCAGATTCGAGACGCGA>CTATGCAGGGCTGGTGC<br>CGATTTCCTTCTTCCA                                                                                                                                                                                                                                                                                                                                                                                                                                                                    |
| A2_10       | <i>P. aeruginosa</i> strain 105819                                     | LOHH01000035.1   | <i>csf3</i> -reverse, KYO74799.1 | <i>csf2</i> -reverse, KYO74800.1 | <i>csf1</i> -reverse, KYO74801.1 | <i>csf5</i> -reverse, KYO74802.1 | <i>csf4</i> , KYO74803.1 | GTATTCCCCGCGCAGG<br>CGGGGGTTAGCG | >GGCTGTGGGGATGAGAAATGAGCAAGCGCGAA>CATCCAAG<br>TTACGCATCAGATTCGAGACGCGA>CTATGCAGGGCTGGTGC<br>CGATTTCCTTCTTCCA                                                                                                                                                                                                                                                                                                                                                                                                                                                                    |
| A2_11       | <i>P. aeruginosa</i> isolate RW109                                     | LT969521.1       | <i>csf4</i> -reverse, SOV33091.1 | <i>csf5</i> , SOV33092.1         | <i>csf1</i> , SOV33093.1         | <i>csf2</i> , SOV33094.1         | <i>csf3</i> , SOV33095.1 | GTATTCCCCGCGCAGG<br>CGGGGGTTAGCG | >GGCTGTGGGGATGAGAAATGAGCAAGCGCGAA>CATCCAAG<br>TTACGCATCAGATTCGAGACGCGA>CTATGCAGGGCTGGTGC<br>CGATTTCCTTCTTCCA                                                                                                                                                                                                                                                                                                                                                                                                                                                                    |
| A2_12       | <i>P. aeruginosa</i> strain WH-SGI-V-07240                             | LLNL01000085.1   | <i>csf4</i> -reverse, KSG28518.1 | <i>csf5</i> , KSG28519.1         | <i>csf1</i> , KSG28520.1         | <i>csf2</i> , KSG28521.1         | <i>csf3</i> , KSG28522.1 | GTATTCCCCGCGCAGG<br>CGGGGGTTAGCG | >GGCTGTGGGGATGAGAAATGAGCAAGCGCGAA>CATCCAAG<br>TTACGCATCAGATTCGAGACGCGA>CTATGCAGGGCTGGTGC<br>GATTCCTTCTTCCA                                                                                                                                                                                                                                                                                                                                                                                                                                                                      |
| A2_13       | <i>P. aeruginosa</i> strain WH-SGI-V-07368                             | LLNS01000021.1   | <i>csf4</i> -reverse, KSG54638.1 | <i>csf5</i> , KSG54639.1         | <i>csf1</i> , KSG54640.1         | <i>csf2</i> , KSG54641.1         | <i>csf3</i> , KSG54642.1 | GTATTCCCCGCGCAGG<br>CGGGGGTTAGCG | >GGCTGTGGGGATGAGAAATGAGCAAGCGCGAA>CATCCAAGT<br>TACGCATCAGATTCGAGACGCGA>CTATGCAGGGCTGGTGC<br>ATTCCTTCTTCCA                                                                                                                                                                                                                                                                                                                                                                                                                                                                       |
| A2_14       | <i>P. aeruginosa</i> strain 560747                                     | MPVA01000073.1   | <i>csf4</i> -reverse, OKR80896.1 | <i>csf5</i> , OKR80897.1         | <i>csf1</i> , OKR80898.1         | <i>csf2</i> , OKR80899.1         | <i>csf3</i> , OKR80900.1 | GTATTCCCCGCGCAGG<br>CGGGGGTTAGCG | >GGCTGTGGGGATGAGAAATGAGCAAGCGCGAA>CATCCAAGT<br>TACGCATCAGATTCGAGACGCGA>CTATGCAGGGCTGGTGC<br>ATTCCTTCTTCCA                                                                                                                                                                                                                                                                                                                                                                                                                                                                       |

(continued)

Supplementary Table ST2. (Continued)

| System name | Genome name                                                               | Genome accession | Gene 1                           | Gene 2                           | Gene 3                           | Gene 4                           | Gene 5                   | Repeat consensus                 | Spacer sequences                                                                                            |
|-------------|---------------------------------------------------------------------------|------------------|----------------------------------|----------------------------------|----------------------------------|----------------------------------|--------------------------|----------------------------------|-------------------------------------------------------------------------------------------------------------|
| A2_15       | <i>P. aeruginosa</i> strain WH-SGI-V-07263                                | LLTV01000009.1   | <i>csf4</i> -reverse, KSQ21174.1 | <i>csf5</i> , KSQ21175.1         | <i>csf1</i> , KSQ21176.1         | <i>csf2</i> , KSQ21177.1         | <i>csf3</i> , KSQ21178.1 | GTATTCCCCGCGCAGG<br>CGGGGGTTAGCG | >GGCTGTGGGGATGAGAAATGAGCAAGCGCGAA>CATCCA<br>AGTTACGCATCAGATTCGAGACGCGA>CTATGCAGGGCTG<br>GTGCGATTTCCTTCTTCCA |
| A2_16       | <i>P. aeruginosa</i> strain ICBDVIM-2                                     | MZND01000202.1   | <i>csf4</i> -reverse, OPL23682.1 | <i>csf5</i> , OPL23683.1         | <i>csf1</i> , OPL23684.1         | <i>csf2</i> , OPL23685.1         | <i>csf3</i> , OPL23686.1 | GTATTCCCCGCGCAGG<br>CGGGGGTTAGCG | >GGCTGTGGGGATGAGAAATGAGCAAGCGCGAA>CATCCAAGT<br>TACGCATCAGATTCGAGACGCGA>CTATGCAGGGCTGGTGC<br>ATTTCCTTCTTCCA  |
| A2_17       | <i>P. aeruginosa</i> strain S122_C02_RS_S122_C02_RS_NODE_21_length_133376 | NFGS01000021.1   | <i>csf3</i> -reverse, OTJ82652.1 | <i>csf2</i> -reverse, OTJ82653.1 | <i>csf1</i> -reverse, OTJ82654.1 | <i>csf5</i> -reverse, OTJ82655.1 | <i>csf4</i> , OTJ82656.1 | GTATTCCCCGCGCAGG<br>CGGGGGTTAGCG | >GGCTGTGGGGATGAGAAATGAGCAAGCGCGAA>CATCCAAG<br>TTACGCATCAGATTCGAGACGCGA>CTATGCAGGGCTGGT<br>GCGATTTCCTTCTTCCA |
| A2_18       | <i>P. aeruginosa</i> strain HSV3483                                       | NINV01000001.1   | <i>csf4</i> -reverse, OVZ72674.1 | <i>csf5</i> , OVZ72675.1         | <i>csf1</i> , OVZ72676.1         | <i>csf2</i> , OVZ72677.1         | <i>csf3</i> , OVZ72678.1 | GTATTCCCCGCGCAGG<br>CGGGGGTTAGCG | >GGCTGTGGGGATGAGAAATGAGCAAGCGCGAA>CATCCAAG<br>TTACGCATCAGATTCGAGACGCGA>CTATGCAGGGCTGGT<br>GCGATTTCCTTCTTCCA |
| A2_19       | <i>P. aeruginosa</i> strain 833                                           | NIPF01000020.1   | <i>csf4</i> -reverse, OWJ33422.1 | <i>csf5</i> , OWJ33423.1         | <i>csf1</i> , OWJ33424.1         | <i>csf2</i> , OWJ33425.1         | <i>csf3</i> , OWJ33426.1 | GTATTCCCCGCGCAGG<br>CGGGGGTTAGCG | >GGCTGTGGGGATGAGAAATGAGCAAGCGCGAA>CATCCAA<br>GTTACGCATCAGATTCGAGACGCGA>CTATGCAGGGCTG<br>GTGCGATTTCCTTCTTCCA |
| A2_20       | <i>P. aeruginosa</i> strain env172                                        | NRAF01000016.1   | <i>csf4</i> -reverse, PBX11570.1 | <i>csf5</i> , PBX11571.1         | <i>csf1</i> , PBX11572.1         | <i>csf2</i> , PBX11573.1         | <i>csf3</i> , PBX11574.1 | GTATTCCCCGCGCAGG<br>CGGGGGTTAGCG | >GGCTGTGGGGATGAGAAATGAGCAAGCGCGAA>CATCCAAGT<br>TACGCATCAGATTCGAGACGCGA>CTATGCAGGGCTGGT<br>GATTTCCTTCTTCCA   |
| A2_21       | <i>P. aeruginosa</i> strain ICBBVIM-2                                     | NWBV01000032.1   | <i>csf4</i> -reverse, PCC88976.1 | <i>csf5</i> , PCC88977.1         | <i>csf1</i> , PCC88978.1         | <i>csf2</i> , PCC88979.1         | <i>csf3</i> , PCC88980.1 | GTATTCCCCGCGCAGG<br>CGGGGGTTAGCG | >GGCTGTGGGGATGAGAAATGAGCAAGCGCGAA>CATCCAAGT<br>TACGCATCAGATTCGAGACGCGA>CTATGCAGGGCTGGT<br>GCGATTTCCTTCTTCCA |
| A2_22       | <i>P. aeruginosa</i> strain ICBSVIM-2                                     | NWBW01000020.1   | <i>csf4</i> -reverse, PCC94571.1 | <i>csf5</i> , PCC94572.1         | <i>csf1</i> , PCC94573.1         | <i>csf2</i> , PCC94574.1         | <i>csf3</i> , PCC94575.1 | GTATTCCCCGCGCAGG<br>CGGGGGTTAGCG | >GGCTGTGGGGATGAGAAATGAGCAAGCGCGAA>CATCCAAG<br>TTCGCATCAGATTCGAGACGCGA>CTATGCAGGGCTGGT<br>GCGATTTCCTTCTTCCA  |
| A2_23       | <i>P. aeruginosa</i> strain S04_90 plasmid                                | CP011370.1       | <i>csf3</i> -reverse, AKG03092.1 | <i>csf2</i> -reverse, AKG03093.1 | <i>csf1</i> -reverse, AKG03094.1 | <i>csf5</i> -reverse, AKG03095.1 | <i>csf4</i> , AKG03096.1 | GTATTCCCCGCGCAGG<br>CGGGGGTTAGCG | >GGCTGTGGGGATGAGAAATGAGCAAGCGCGAA>CATCCAAG<br>TTACGCATCAGATTCGAGACGCGA>CTATGCAGGGCTGGT<br>GCGATTTCCTTCTTCCA |
| A2_24       | <i>P. aeruginosa</i> strain WH-SGI-V-07259                                | LLTS01000090.1   | <i>csf3</i> -reverse, KSQ08350.1 | <i>csf2</i> -reverse, KSQ08351.1 | <i>csf1</i> -reverse, KSQ08352.1 | <i>csf5</i> -reverse, KSQ08353.1 | <i>csf4</i> , KSQ08354.1 | GTATTCCCCGCGCAGG<br>CGGGGGTTAGCG | >GGCTGTGGGGATGAGAAATGAGCAAGCGCGAA>CATCCAAG<br>TTACGCATCAGATTCGAGACGCGA>CTATGCAGGGCTGGT<br>GCGATTTCCTTCTTCCA |
| A2_25       | <i>P. aeruginosa</i> strain WH-SGI-V-07273                                | LLUB01000009.1   | <i>csf3</i> -reverse, KSQ35844.1 | <i>csf2</i> -reverse, KSQ35845.1 | <i>csf1</i> -reverse, KSQ35846.1 | <i>csf2</i> -reverse, KSQ35847.1 | <i>csf4</i> , KSQ35848.1 | GTATTCCCCGCGCAGG<br>CGGGGGTTAGCG | >GGCTGTGGGGATGAGAAATGAGCAAGCGCGAA>CATCCAAGT<br>TACGCATCAGATTCGAGACGCGA>CTATGCAGGGCTGGT<br>GCGATTTCCTTCTTCCA |
| A2_26       | <i>P. aeruginosa</i> strain WH-SGI-V-07327                                | LLVN01000097.1   | <i>csf3</i> -reverse, KSS90966.1 | <i>csf2</i> -reverse, KSS90967.1 | <i>csf1</i> -reverse, KSS90968.1 | <i>csf5</i> -reverse, KSS90969.1 | <i>csf4</i> , KSS90970.1 | GTATTCCCCGCGCAGG<br>GGGGGTTAGCG  | >GGCTGTGGGGATGAGAAATGAGCAAGCGCGAA>CATCCAAGT<br>TACGCATCAGATTCGAGACGCGA>CTATGCAGGGCTGGT<br>GCGATTTCCTTCTTCCA |
| A2_27       | <i>P. aeruginosa</i> strain Br993                                         | LZQI01000014.1   | <i>csf3</i> -reverse, OFC00169.1 | <i>csf2</i> -reverse, OFC00170.1 | <i>csf1</i> -reverse, OFC00171.1 | <i>csf5</i> -reverse, OFC00172.1 | <i>csf4</i> , OFC00173.1 | GTATTCCCCGCGCAGG<br>GGGGGTTAGCG  | >GGCTGTGGGGATGAGAAATGAGCAAGCGCGAA>CATCCAAGT<br>TACGCATCAGATTCGAGACGCGA>CTATGCAGGGCTGGT<br>GCGATTTCCTTCTTCCA |
| A2_28       | <i>P. aeruginosa</i> strain WH-SGI-V-07172                                | LLMB01000016.1   | <i>csf4</i> -reverse, KSD76398.1 | <i>csf5</i> , KSD76399.1         | <i>csf1</i> , KSD76400.1         | <i>csf2</i> , KSD76401.1         | <i>csf3</i> , KSD76402.1 | GTATTCCCCGCGCAGG<br>GGGGGTTAGCG  | >GGCTGTGGGGATGAGAAATGAGCAAGCGCGAA>CATCCAAGT<br>TACGCATCAGATTCGAGACGCGA>CTATGCAGGGCTGGT<br>GATTTCCTTCTTCCA   |
| A2_29       | <i>P. aeruginosa</i> strain S700_C14_RS_S700_C14_RS_NODE_20_length_141227 | NFFQ01000020.1   | <i>csf3</i> -reverse, OTI20239.1 | <i>csf2</i> -reverse, OTI20240.1 | <i>csf1</i> -reverse, OTI20241.1 | <i>csf5</i> -reverse, OTI20242.1 | <i>csf4</i> , OTI20243.1 | GTATTCCCCGCGCAGG<br>GGGGGTTAGCG  | >GGCTGTGGGGATGAGAAATGAGCAAGCGCGAA>CATCCAAGT<br>TACGCATCAGATTCGAGACGCGA>CTATGCAGGGCTGGT<br>GCGATTTCCTTCTTCCA |
| A2_30       | <i>P. aeruginosa</i> strain env408                                        | NRFQ01000019.1   | <i>csf3</i> -reverse, PCA65643.1 | <i>csf2</i> -reverse, PCA65644.1 | <i>csf1</i> -reverse, PCA65645.1 | <i>csf5</i> -reverse, PCA65646.1 | <i>csf4</i> , PCA65647.1 | GTATTCCCCGCGCAGG<br>GGGGGTTAGCG  | >GGCTGTGGGGATGAGAAATGAGCAAGCGCGAA>CATCCAAGT<br>TACGCATCAGATTCGAGACGCGA>CTATGCAGGGCTGGT<br>GCGATTTCCTTCTTCCA |
| A2_31       | <i>P. aeruginosa</i> strain S742_C15_BS_S742_C15_BS_NODE_39_length_75586  | NFFQ01000039.1   | <i>csf3</i> -reverse, OTH77721.1 | <i>csf2</i> -reverse, OTH77722.1 | <i>csf1</i> -reverse, OTH77723.1 | <i>csf5</i> -reverse, OTH77724.1 | <i>csf4</i> , OTH77725.1 | GTATTCCCCGCGCAGG<br>GGGGGTTAGCG  | >GGCTGTGGGGATGAGAAATGAGCAAGCGCGAA>CATCCAAGT<br>TACGCATCAGATTCGAGACGCGA>CTATGCAGGGCTGGT<br>GCGATTTCCTTCTTCCA |
| A2_32       | <i>P. aeruginosa</i> strain SPA01                                         | LQBU01000137.1   | <i>csf3</i> -reverse, KWR92602.1 | <i>csf2</i> -reverse, KWR92603.1 | <i>csf1</i> -reverse, KWR92604.1 | <i>csf5</i> -reverse, KWR92605.1 | <i>csf4</i> , KWR92606.1 | TGTTTCCCGCGTATAGG<br>CGGCTGAAGG  | >GGCTGTGGGGATGAGAAATGAGCAAGCGCGAA>CATCCAAG<br>TTACGCATCAGATTCGAGACGCGA>CTATGCAGGGCTGGT<br>GCGATTTCCTTCTTCCA |

(continued)

Supplementary Table ST2. (Continued)

| System name | Genome name                                      | Genome accession | Gene 1                              | Gene 2                           | Gene 3                              | Gene 4                              | Gene 5 | Repeat consensus                  | Spacer sequences                                                                                                                                                                                                                                                                                                                                                                                                                                                                                                                                                                                                                                                                                                            |
|-------------|--------------------------------------------------|------------------|-------------------------------------|----------------------------------|-------------------------------------|-------------------------------------|--------|-----------------------------------|-----------------------------------------------------------------------------------------------------------------------------------------------------------------------------------------------------------------------------------------------------------------------------------------------------------------------------------------------------------------------------------------------------------------------------------------------------------------------------------------------------------------------------------------------------------------------------------------------------------------------------------------------------------------------------------------------------------------------------|
| A3_1        | <i>P. aeruginosa</i> BL23                        | AXPD01000036.1   | <i>csf2</i> , ERX94041.1            | <i>csf3</i> , ERX94042.1         | <i>csf4</i> , ERX94043.1            | <i>csf3</i> , ERX94044.1            |        | TGTTTGCCGCCGTATAGG<br>CGGCTTGAAGG | >GTCGCCCTTCCTTGAGTGGCTTTTTTGGAGCCGA>CGAACGGGGC<br>TCTCAGCGAGATGGTCGTTGGC>GTTTGTGGCGATCTTCTC<br>AGCTCCCATCATT>CCCAGTCCACCTTACGAAAAGCCTCTGG<br>ATGA>TCAGCTTCTCAAAATTAAGGGATATAGGGACC>ACGT<br>TGCCATGAAATCCTTCTCGGTACGTGTG>GCGAAGTAGGCGA<br>TCAGCAGTGCAGCATGCC>TACATGGCCAGGGCAAGTGC<br>CCGGCCTGCGGC>CATGTTTGGCAACTGAACAGCATGCGGT<br>GCCA>GCATACGATGAGAGCGGTGGCGCTGTTTTCGG>ATGC<br>TGTTCAACGACTACGGCAGCGTGTTC                                                                                                                                                                                                                                                                                                                   |
| A3_2        | <i>Pseudomonas chengduensis</i> strain DSM 26382 | FMZQ01000007.1   | <i>csf2</i> , SDC86395.1            | <i>csf3</i> , SDC86423.1         | <i>csf4</i> , SDC86447.1            | <i>csf3</i> , SDC86471.1            |        | TGTTTGCCGCCGTATAGG<br>GGCTTGAAGG  | >TCCTGTAGCGCAGTTCGCAAACCGCAGCAAC>TATTTGGGG<br>ATTTGAAAGGGATTGACGGTT>GGCTGTGGGGGTGAGAAA<br>TGAGCAAAGCGCAA>GATCGTAGTGTATGCGATAAAGAGCA<br>TGCCCGC>AGCCTTACACTTATAGTCCGTTACTGTGTATGA<br>>TTGGTTGTACCAATAGCCGGCGAAGAGCCAGTC>TAACCCG<br>TGGTGGACGTTCCGGCGGTCAAGGAA>TAAGTCGGTCGATCA<br>GGTGACTAATCTGCCAG>TGTGCTGAGCCAGCAACCCGATC<br>TGCTGTGTC>TAGGAAGATGCCACTGCGCTGGCTGCCTGG<br>GTG>GAGGCTGGCTGCCAAGGGCAAAGCTATCATTC                                                                                                                                                                                                                                                                                                               |
| A3_3        | <i>P. aeruginosa</i> strain WH-SGI-V-07067       | LLL01000002.1    | <i>csf2</i> ,<br>KSC76904.1         | <i>csf3</i> , KSC76905.1         | <i>csf4</i> , KSC76906.1            | <i>csf3</i> , KSC76907.1            |        | TGTTTGCCGCCGTATAGG<br>GGCTTGAAGG  | >GTCCGATAGTCAGGCCACTGACGATTGCAAGCA>CTGCGGAA<br>TCGTTGAAGACGGCTGCGAAACT>GTACGATCTCGGAAIT<br>TGCGTATCTGGGATAC>AACAGTGGGGCATCGTATCGGAC<br>GGCTTT>GCATAAGCAGGAAATGGGAGGTGAGCCCTGTT<br>>TAATCGACCGATCTAGGGGACAGCGGGTAG>CGCGCGA<br>GAACATACAGGTCAGA>GGCGATAGGTTTCAATTGGGCT<br>TAACGCATC>TTCGCTGCTCTCGATCCGGGGACGCTTACAC<br>>CAGTACCCGACGTGACGATCGTATTAGCAG>GCGGAA<br>TGTCCGGCAGTCTCCGGCGGCGACTC>AGGTCCGACGCTG<br>GCACTCGGCCACTCATAC>AGGTTGCTCCAGTACCCCTGCT<br>CTCGCGGCTC>AAACGAGGCGGGCACCCCAACGAAACCT<br>GGT>GGAGCGGGAGCGCGCAAGACAAGCCACAGCA>TG<br>GCGCATGGATTCCATTACATCCCGTCAAC>GGAGCGGGAGC<br>GCGACCAAGACAAGCCACAGCA>TTCGCTGCTCTCGATCCG<br>GGGACGCTTACAC>AGCAGTGTATTGCGTCTGATCATTC<br>CCCCACC>GCGGAATGTCGGCGAGTCTCCGGCGGCGACTC  |
| A3_4        | <i>Pseudomonas saponiphila</i> strain DSM 9751   | FNTJ01000003.1   | <i>csf3</i> -reverse,<br>SED27694.1 | <i>csf4</i> -reverse, SED27713.1 | <i>csf5</i> -reverse,<br>SED27736.1 | <i>csf2</i> -reverse,<br>SED27762.1 |        | TGTTTGCCGCCGTATAGG<br>GGCTTGAAGG  | >AAAAAGATCAGTAGGCGGTAGCCACAGCTG>CTCGTGTCA<br>GCCCTCCTTTACCGTGAACCGTT>ATCGATACAGCGTCTG<br>CTGGCCGATACTGA>AATGGAGCGGATGTTGCTCTGCA<br>TATCAGC>CGAGGGTCATACCGAGGCGCTGTTTGGC<br>TA>ATGGACGTAGCGCCAGTGTCTAGCCTGGGTGC>ACAG<br>TCACGCATACACTTCACTTGTAAAGC>ACTGCATGACGGGAGC<br>CTGGGGCGCATCCA>CACACCTGCGAAGGCTTCAATGTCG<br>CGCTATA>TGTACCGCATTACCCTCAGAATGCCAATTC>GTC<br>ATGCAGGGGCTCGTTAATGCGCTTGAT>CGCGAGGACGCTG<br>TCCACGCATTATCTCGGGCA>ATAAACCAGGCAAAACCCGC<br>CCAATCCTCTG>TGATTACAACATCACTCAACTGGTCTATCTG<br>A>AACTGCATCGGGTTCGGTGGATGACACAGGAA>CAGCT<br>GTGGGCTACCGCCTACTGATCTTTT>ACTGCATGCTGGGAA<br>CCCTGGGGCGCATCCA>TATAGCGCGACATGAAGCCTTCGC<br>AGGTGTG>TGTACCGCATTACCCTCAGAATGCCAATTC>TC<br>GAGTATGCAAGGGCTCGTTAATACGCTTGAT |
| A3_5        | <i>Pseudomonas</i> sp. J237                      | MKEP01000030.1   | <i>csf3</i> -reverse,<br>OEO24419.1 | <i>csf4</i> -reverse, OEO24420.1 | <i>csf5</i> -reverse,<br>OEO24421.1 | <i>csf2</i> -reverse,<br>OEO24422.1 |        | TGTTTGCCGCCGTATAGG<br>GGCTTGAAGG  | >TCCTGTAGCGCAGTTCGCAAACCGCAGCAAC>TATTTGGGG<br>ATTTGAAAGGGATTGACGGTT>GGCTGTGGGGGTGAGAAA<br>TGAGCAAAGCGCAA>GATCGTAGTGTATGCGATAAAGAGCAT<br>GCCCGC>AGCCTTACACTTATAGTCCGTTACTGTGTATGA>TT<br>GGTTGTACCAATAGCCGGCGAAGAGCCAGTC>TAACCCGT<br>GGTGACGTTCCGGCGGTCAAGGAA>TAAGTCGGTCGATCAG<br>GTGACTAATCTGCCAG>TGTGCTGAGCCAGCAACCGATC<br>TGCTGTGTC>TAGGAAGATGCCACTGCGCTGGCTGCCTTG<br>GGT>CGCGAGGACGTGTCCACGCATTATCTCGGGCA                                                                                                                                                                                                                                                                                                                 |

(continued)

Supplementary Table ST2. (Continued)

| System name | Genome name                                                               | Genome accession | Gene 1                   | Gene 2                           | Gene 3                           | Gene 4                           | Gene 5                           | Repeat consensus                | Spacer sequences                                                                                                                                                                                                                                                                                                                                                                                                                                                                                                                                                                                                                                                                                                                            |
|-------------|---------------------------------------------------------------------------|------------------|--------------------------|----------------------------------|----------------------------------|----------------------------------|----------------------------------|---------------------------------|---------------------------------------------------------------------------------------------------------------------------------------------------------------------------------------------------------------------------------------------------------------------------------------------------------------------------------------------------------------------------------------------------------------------------------------------------------------------------------------------------------------------------------------------------------------------------------------------------------------------------------------------------------------------------------------------------------------------------------------------|
| A4_1        | <i>P. aeruginosa</i> strain S650_C13_BS S650_C13_BS_NODE_13_length_207944 | NFFU01000013.1   | Cas1-reverse, OTI18532.1 | <i>csf3</i> -reverse, OTI18533.1 | <i>csf4</i> -reverse, OTI18534.1 | <i>csf5</i> -reverse, OTI18535.1 | <i>csf2</i> -reverse, OTI18536.1 | TGTGTGCCGCGGTGATAGG TGGCTTGAAGT | >CAGTTGATCATGTCTACCCGAATATCCTTGATG>TTGATCATA GGGTCCCAACTGCATCGATTGAGGT>ATTGAAGGTGCGCTG CCGCGTACGCTGCCAGGA>CGAACGGGCGTCTCAGCGAGAT GGTTCGCTTGGC>GTTTGTGGCGATCTTCTCAGTCCCATCA TTT>CCCGATCCACCTTACGAAAAGCCTCTGGATGA>TCAG CTTCTCAAATAAAGGGATATAGGGACC>ACGTTGCCATGAA ATCCTTCTCGGTACGTGTG>GCGAAGTAGGGCATCAGCAG TCGCAGCATGCC>TACATGCGCAAGGGCAAGTCCCGGCC TGGCGC>CATGTTTGCCTGAACTGAACAGCATGCGGTGCCA>G CATACGATGAGAGCGGTGGCGCTGTTTTCGG>ATGCTGTC CAACGACTACGGCAGCGTGTAC>AGTCGTACCCCGCC ACGTCCGCGTAAACATCCA                                                                                                                                                                                                                                              |
| A4_2        | <i>P. aeruginosa</i> strain S625_C13_RS S625_C13_RS_NODE_13_length_206276 | NFFW01000013.1   | Cas1-reverse, OTI37122.1 | <i>csf3</i> -reverse, OTI37123.1 | <i>csf4</i> -reverse, OTI37124.1 | <i>csf5</i> -reverse, OTI37125.1 | <i>csf2</i> -reverse, OTI37126.1 | TGTGTGCCGCGGTGATAG GTGGCTTGAAGT | >CAGTTGATCATGTCTACCCGAATATCCTTGATG>TTGATCATA GGGTCCCAACTGCATCGATTGAGGT>ATTGAAGGTGCGCTG CCGCGTACGCTGCCAGGA>CGAACGGGCGTCTCAGCGAGAT GGTTCGCTTGGC>GTTTGTGGCGATCTTCTCAGTCCCATCA TTT>CCCGATCCACCTTACGAAAAGCCTCTGGATGA>TCAGC TTTCAAATAAAGGGATATAGGGACC>ACGTTGCCATGAAA TCCTTCTCGGTACGTGTG>GCGAAGTAGGGCATCAGCAGTG CGACGATGCC>TACATGCGCAAGGGCAAGTCCCGGCC TGGC>CATGTTTGCCTGAACTGAACAGCATGCGGTGCCA>GCATAC GATGAGAGCGGTGGCGCTGTTTTCGG>ATGCTGTCCAACGAC TACGGCAGCGTGTAC>AGTCGTACCCCGCCACGTCCGGC TAAACATCCA                                                                                                                                                                                                                                                 |
| A4_3        | <i>P. aeruginosa</i> strain S619_C13_RS S619_C13_RS_NODE_15_length_187807 | NFFX01000015.1   | Cas1-reverse, OTI43277.1 | <i>csf3</i> -reverse, OTI43278.1 | <i>csf4</i> -reverse, OTI43279.1 | <i>csf5</i> -reverse, OTI43280.1 | <i>csf2</i> -reverse, OTI43281.1 | TGTGTGCCGCGGTGATAGG TGGCTTGAAGT | >CAGTTGATCATGTCTACCCGAATATCCTTGATG>TTGATCATA GGGTCCCAACTGCATCGATTGAGGT>ATTGAAGGTGCGCTG CCGCGTACGCTGCCAGGA>CGAACGGGCGTCTCAGCGAG ATGGTCGCTTGGC>GTTTGTGGCGATCTTCTCAGTCCCA TCATTT>CCCGATCCACCTTACGAAAAGCCTCTGGATGA >TCAGCTTCTCAAATAAAGGGATATAGGGACC>ACGTTGCC ATGAAATCCTTCTCGGTACGTGTG>GCGAAGTAGGGCA TCAGCAGTGCAGCATGCC>TACATGCGCAAGGGCAAGTG CCCGGCCTGCGGC>CATGTTTGCCTGAACTGAACAGCATGCGGT GCCA>GCATACGATGAGAGCGGTGGCGCTGTTTTCGG>ATGC TGTCACGACTACGGCAGCGTGTAC>AGTCGTACCCCG CCACGTCCGCGTAAACATCCA                                                                                                                                                                                                                                                 |
| A4_4        | <i>P. putida</i> strain MC4-5222                                          | JOJW01000110.1   | <i>csf2</i> , KEX94883.1 | <i>csf5</i> , KEX94884.1         | <i>csf4</i> , KEX94885.1         | <i>csf3</i> , KEX94886.1         | Cas1, KEX94887.1                 | TGTGTGCCGCGGTGATAG GTGGCTTGAAGT | >TTCAATCTCACGCATCACTTACGCTATATGCAA>AGAGTTCTG CATCCGCACTCGATCGTTCGAG>CCACCAGGAGCGCTC ACCCGCGCCCGCTCGCG>CCATTTATGCGGGTTTTGGGGCGT ATGCTTTGA>CTCAGAGCAAGCTGCGCGGAGCGTGAGGC ACA>GCCGCATCGACTCACGCAAGCTGCGCAGC>CTGG AAGTGCATTTGCTTGTGACAACCTGCGG>GACATACGCG GGCAACAGCGTGTGAGGTGCGAG>TATATGGGTTACTGCAC GAGTGTGACTCGGG>AGTTGTTGCGCTGTGCGGGGGAC ATGCACCG>TATAACCAGTTCACGCTAATGGAGCTGAGGAAG >GXXXFXAFTTXXAFTXATGXXTTATXGAAA>XXXGATXX AXXTTAXGAAAFTXXTTTATG>TXAFTTXXAAAAT AAFTTATATATGTTAXX>TTAATXFTXATGAXXXTTXXGAX GXAXATXA>AXFTTXXAFTGAAATXXTTXFTTAXFTTFT >FXGAAFTATXGATXATXATFTXGAXGATXX>TAXATFXA AAFTXAAFTTXXXITXXTTXFTX>XATTTTTXGAAFTTAA XAFTXATFTTXXA>FXATAXATGATGATXFTTXXFTT TTXT>ATFTTXXAAXGAXTAXFTXATFTTXXA>XAT AXXTTXGAAFTTXXAAXTXGXXGXXGATG |
| A4_5        | <i>Pseudomonas rhodesiae</i> strain BS2777                                | LT629801.1       | <i>csf2</i> , SDV17078.1 | <i>csf5</i> , SDV17080.1         | <i>csf4</i> , SDV17082.1         | <i>csf3</i> , SDV17084.1         | Cas1, SDV17086.1                 | TGTGTGCCGCGGTGATAGG TGGCTTGAAGT | >CAGTGTCTAAATGACTGGCTGAGCGCTGTCGG>ATCAAGGG TGGCTTCTGCTCGATCCTCACCTA>ACGTTGCCATGAAAT CCTTCTCGGTACGTGTG>GCGAAGTAGGGCATCAGCAGTGC GACGATGCC>TACATGCGCAAGGGCAAGTCCCGGCCCTGC GGC>CATGTTTGCCTGAACTGAACAGCATGCGGTGCCA>GAG CGCGGAGAACATACAGGTGAGA>ATGCTGTCCAACGACTAC GGCAGCGTGTAC>GGCGGATAGGTTTTCAATTGGGCTTA ACGCATC                                                                                                                                                                                                                                                                                                                                                                                                                                 |
